# Supplementary material for: miR-101 Inhibiting Cell Proliferation, Migration and Invasion in Hepatocellular Carcinoma through Downregulating Girdin
Source: PubMed Central journal article supplement — Mol Cells. 2016 Jan 7;39(2):96–102. doi: 10.14348/molcells.2016.2161 (PMC4757808; doi:10.14348/molcells.2016.2161), 2016-01-07
Supplement: molce-39-2-96-supple.pdf [file molce-39-2-96-supple.pdf]

Girdin 3'-UTR (NM\_001135597) sequence

tcagttctcagatgaagcctttattctgaagtaacaagacacctagcaactataggaatcattttaaaaatcttaagagactttaacagtccttcgt  
gaatagagcaggcaagaaatacaaaccttcattccttgatcaaggagcactactggattcaactgcaaaaatcttaaggttttaggacttactatac  
cttgactgttaagatctactgaataaaggacgttctcactaaggaccaggtgtttaagggttaagtgttaaaagaagtactccaagaacaatctgctttt  
tcatcattggtttatgaattatccatggttcttaagctctgctgaagtgtagcctaaatctagccattatattagttgtgtaaacctaaataatgctgta  
gtattttggaatgactatataagcaagatacagagaaaattgtttggcatgtagagccttattggtagcagactgcatgtgtgatacttttttctta  
aagccaattattttgatgcaaaagaaatcagttataagataaactgaaaaatcataatgaaataggagttataaaaaattatagtgatattaatcttc  
catattcccaataagcaactaagcattcataagtaaccatggttaaagaggttttctgaaacttttttagtaagatggttttcagcaaatggcattc  
ccaagataaagctgtgtgctttaactcattctttcttggattgggttagtatgctgtgcatttttaactgagagctgactgttgccttaagaagtttc  
ttatggcaaaaatgtaataagttactatgatctgcattttccagaaactcattataaataaggctatcattattaatgatttttctctttatgatatta  
cattaaagttgataactgttattggtactttgaaatattgtatgcatgttacccttaaacatttggagaagcacaataaataatagattagtaaccagg  
gaaacatcaatttttagtagttccaatttatatcacagttttttcttatgaaatcaaaaaatgactgatactcattatgcaaatcattatataacataa  
tatcagagtaacttcaaggtctgaaatgagaacatactgacttttaaaatttaacagtgacttcttaggcttcattaccagctctgagaacttttgg  
aataattccatattccatagtggtgtgtggtttatgagttgtgggttcatcactaaccagtaaccataagaaaagtctctctctctctctctctctct  
ctctccctcttctctctctctctgtagccagtagcaatgtgtgttcacagctcaatttcaaaagaccatcaataaaaaagagagcatgttaaatgaa  
atggaacttagagaactgagcttactacgtactcaatgccaccggttaacttaggtttaccaccaaatgctgttaacgttaaatcattttgaaatcttg  
gatgaaaggtgctatgtaaatggaatacaaaaggattctactaacatacaaaaaatgcacaacagaaatactaaaacctttccgtagactttgaaa  
catctctctctcactaactccctgattcaagtagcacattggaataggtatcagagcagctagagacaattgcatgcaaaaaatgtacattcatttt  
agggtgataaaaagtaaacatagaaattatggttagcctaaatagttggttaacttagattatattagctagcatcattttgcacaactagaacac  
atcccagaacaattactgaaaagctgaaatfaatgggtggtgtagcccaatgagggcgaatgacattacagcttgacctctccagaacactaata  
tcctaaaatacagaacatgctgggttaagtgcattagcttcaagcagaaaaatgctgaaaacaacgtgtaaagtactgaatctgagtaggctgacct  
gagaaggggacaatfaagagacaaccaagggaacacattgagactacaaaaatgaataatctcaattatattcatcacactttttcataccattcaa  
gaaacgactagacagtagtaaccacatgaatatttactttctcagtatacccttgagaagcaaacctttaggaagccactctctcccctaaacaactc  
tgccaaacaataaataagccaactggaaacgaatcggagccattttcatttctcaaccgggctgacatgcttaaatatctgctgtattctaaatca  
acacctaaccctcaaggaactgaagaatcaatatacagggtaatagctttggctcagagctcaataatgtgcttcagatctgcatgtgaaatg  
ctttcatccaaatfttaattggtggttaccaaaaggttcacaaaacaggtttgatgtagcacctttcatgcaaggcatgcaaaaagcctattttaaatc  
actgtgcatattatagattgtagccactcaaatgaagtactacagcctgtgctgtcttaatggtttatgtcaggaatgaaaaagatactgtaccaat  
ctggaattacaatggggagtaataatgtactaaatgacttttatttaagttacttttgtgagtggtgaattttgtttttctttcagctacactagctc  
tgagatgtattttcttaagcttgaatgaatacaaaaaggagccattttataataaaccttgatgtacatgttgaatattggacaatgaaaatgcctt  
aaaaggatgcatatggataaagttgacttataacaccttcaacaaaatcaattttaaattgtcttttctttcttattaagggtttcttttcagtgtctacc  
attgtactataactgttattaaatcaaatcaataataaaaagctgtaacatttcttttaaaactaatgctaataagggatttagagttgaatgcaaaa  
tgtttacttggcaatacctgatgtagctacaggtatccaactcatgacaagagataccactgtttgttttaaaaaaacattttcattttgttctcttca  
aaaattaagttgactaacattcacgtatcaactaatataaaaagaaataaaaccaagaggtattttgtaacaaaaaaaaaaaaaaaa

**Supplement Figure.1** This is the sequence of Girdin 3'-UTR. Sequences with a grey background represent the position of primers, while underlined sequences represent the two possible binding sites of miR-101.

Girdin-3'-UTR-1-F: **CTCGAG**CAGGCAAGAAATACAAACC (Xho I)  
Girdin-3'-UTR-1-R: **GCGGCCGC**GCTAACCAAATAAGGCTCT (Not I)  
Mut-Girdin-3'-UTR-1-F: **GCGGCCGC**CAGGCAAGAAATACAAACC (Not I)  
Mut-Girdin-3'-UTR-1-R: **CTCGAGG**GCTAACCAAATAAGGCTCT (Xho I)

Girdin-3'-UTR-2-F: **CTCGAG**TTGTATGTAGCACCTTTC (Xho I)  
Girdin-3'-UTR-2-R: **GCGGCCGC**CATTGTCCAAATATCTCAA (Not I)  
Mut-Girdin-3'-UTR-2-F: **GCGGCCGC**TTGTATGTAGCACCTTTC (Not I)  
Mut-Girdin-3'-UTR-2-R: **CTCGAG**CATTGTCCAAATATCTCAA (Xho I)

**Supplement Figure.2** The sequences of Girdin and Girdin-Mut.
